# Supplementary material for: Nutritional regulation of oligodendrocyte differentiation regulates perineuronal net remodeling in the median eminence
Source: PubMed Central journal article supplement (PMC8293628; doi:10.1016/j.celrep.2021.109362), 2021-07-13
Supplement: mmc1.pdf [file mmc1.pdf]

**Supplemental information**

**Nutritional regulation of oligodendrocyte  
differentiation regulates perineuronal net  
remodeling in the median eminence**

**Sara Kohnke, Sophie Buller, Danae Nuzzaci, Katherine Ridley, Brian Lam, Helena Pivonkova, Marie A. Bentsen, Kimberly M. Alonge, Chao Zhao, John Tadross, Staffan Holmqvist, Takahiro Shimizo, Hannah Hathaway, Huiliang Li, Wendy Macklin, Michael W. Schwartz, William D. Richardson, Giles S.H. Yeo, Robin J.M. Franklin, Ragnhildur T. Karadottir, David H. Rowitch, and Clemence Blouet**



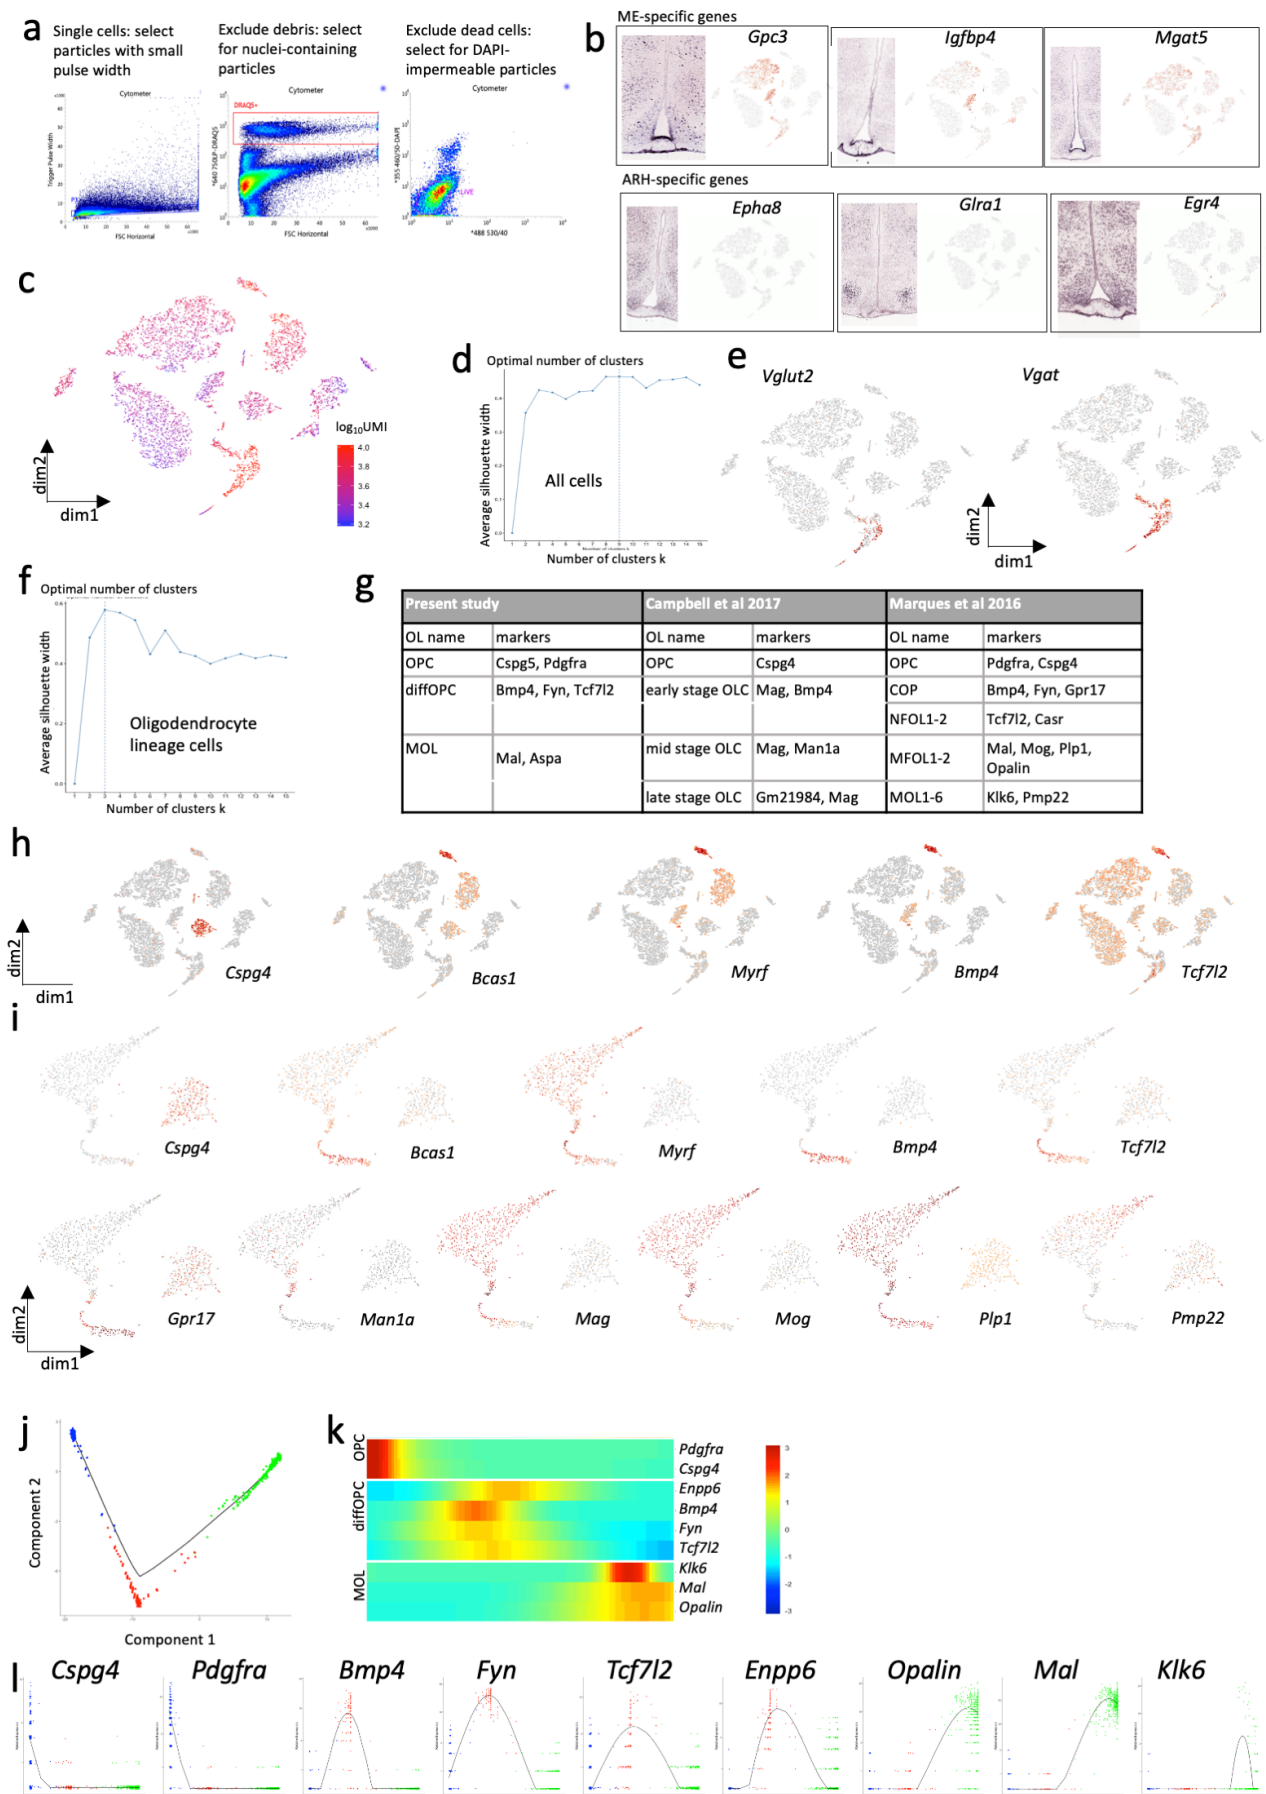

**Figure S1. Single cell transcriptomic analysis reveals 3 types of oligodendrocyte lineage cells in the ME. Related to Figure 1.**

**(a)** FACS cell sorting strategy. **(b)** Allen Mouse Brain ISH gene expression images compared to gene expression in current dataset for ME / ARC specific genes (red labels high expression of the gene in the tSNE plot). **(c)** Log<sub>10</sub>UMI counts per cell mapped on tSNE plot. **(d)** Silhouette analysis (optimal cluster analysis) of tSNE object coordinates. **(e)** GABAergic (express vesicular GABA transporter, Vgat) and glutamatergic (express vesicular glutamate transporter 2, Vglut2) gene expression in current dataset. **(f)** Silhouette analysis (optimal cluster analysis) of tSNE object coordinates. **(g)** Comparison of terminology and defining markers between current study and two others examining single-cell transcriptomes of OLs. **(h-i)** tSNE plots of current dataset (main and oligodendrocyte lineage specific clustering) showing expression of defining OL markers used in other studies. Red = high expression, grey = low expression. **(j)** Unsupervised ordering of OL clusters along a developmental trajectory (arrows indicate direction) show developmental progression from OPCs (blue) to NFOLs (red) to MOLs (green). **(k)** Heatmap showing relative expression of genes associated with OPCs, NFOLs, and MOLs along pseudotime. **(l)** Scatterplots showing relative expression of genes associated with OPCs, NFOLs, and MOLs along pseudotime.

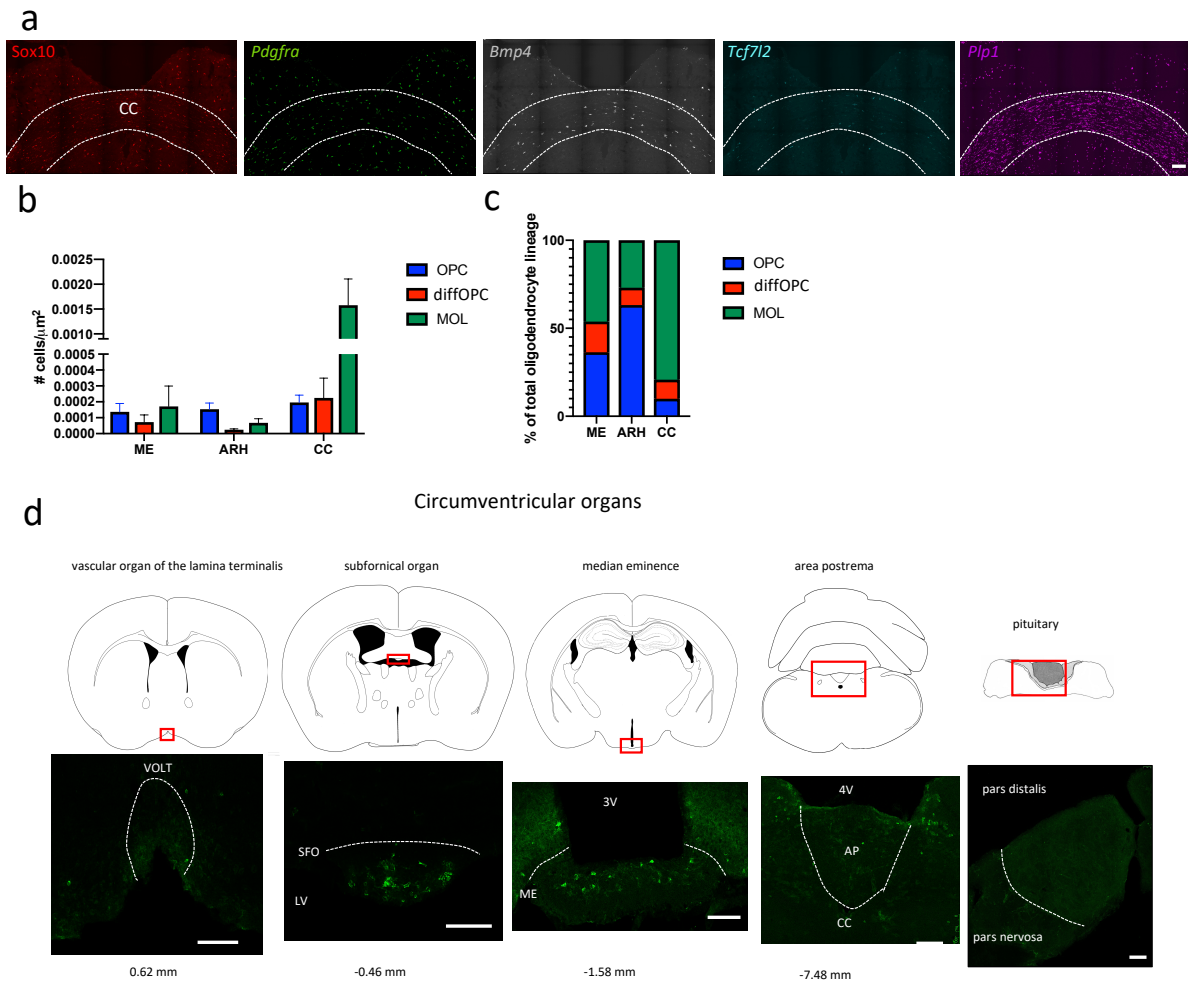

**Figure**

**Figure S2. The diffOPC and MOL populations are concentrated in the dorsal part of the murine and human ME. Related to Figure 2.**

(a) RNAscope combined to immunohistochemistry enables detection of OL subtype marker gene expression in the corpus callosum: red = *Sox10* (IHC, pan-OL marker), green = *Pdgfra* (OPC marker), grey = *Bmp4* (NFOL marker), blue = *Tcf7l2* (NFOL marker), purple = *Plp1* (MOL marker). Scale bar = 100  $\mu$ m. (b) Densities of OL lineage cells in the ME, ARH and CC. Error bars depict mean  $\pm$  SEM. (c) Proportions of OPCs/NFOLs/MOLs in the ME, ARH, and CC. (d) APC (green, a postmitotic OL marker) labels sparse cells in the SFO and AP but not in the VOLT or pituitary. Scale bars = 100  $\mu$ m

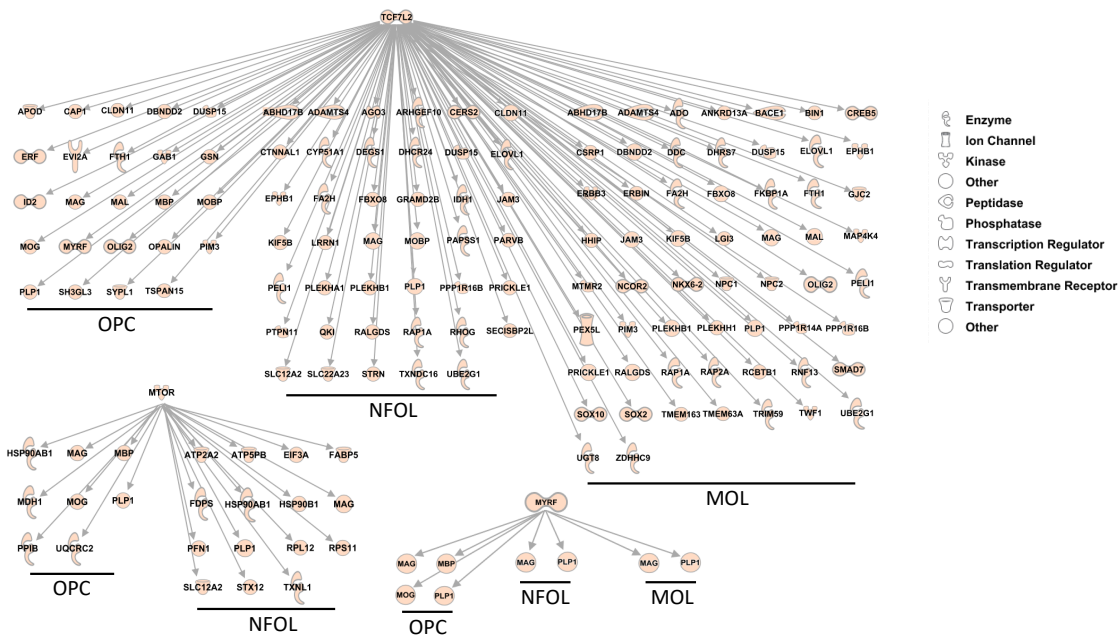

**Figure S3. Nutritional signals rapidly regulate the transcriptome of oligodendrocyte lineage cells in the adult ME. Related to Figure 3.**

Genes downstream from top upstream regulators *Tcf7l2*, *Mtor*, and *Myrf*

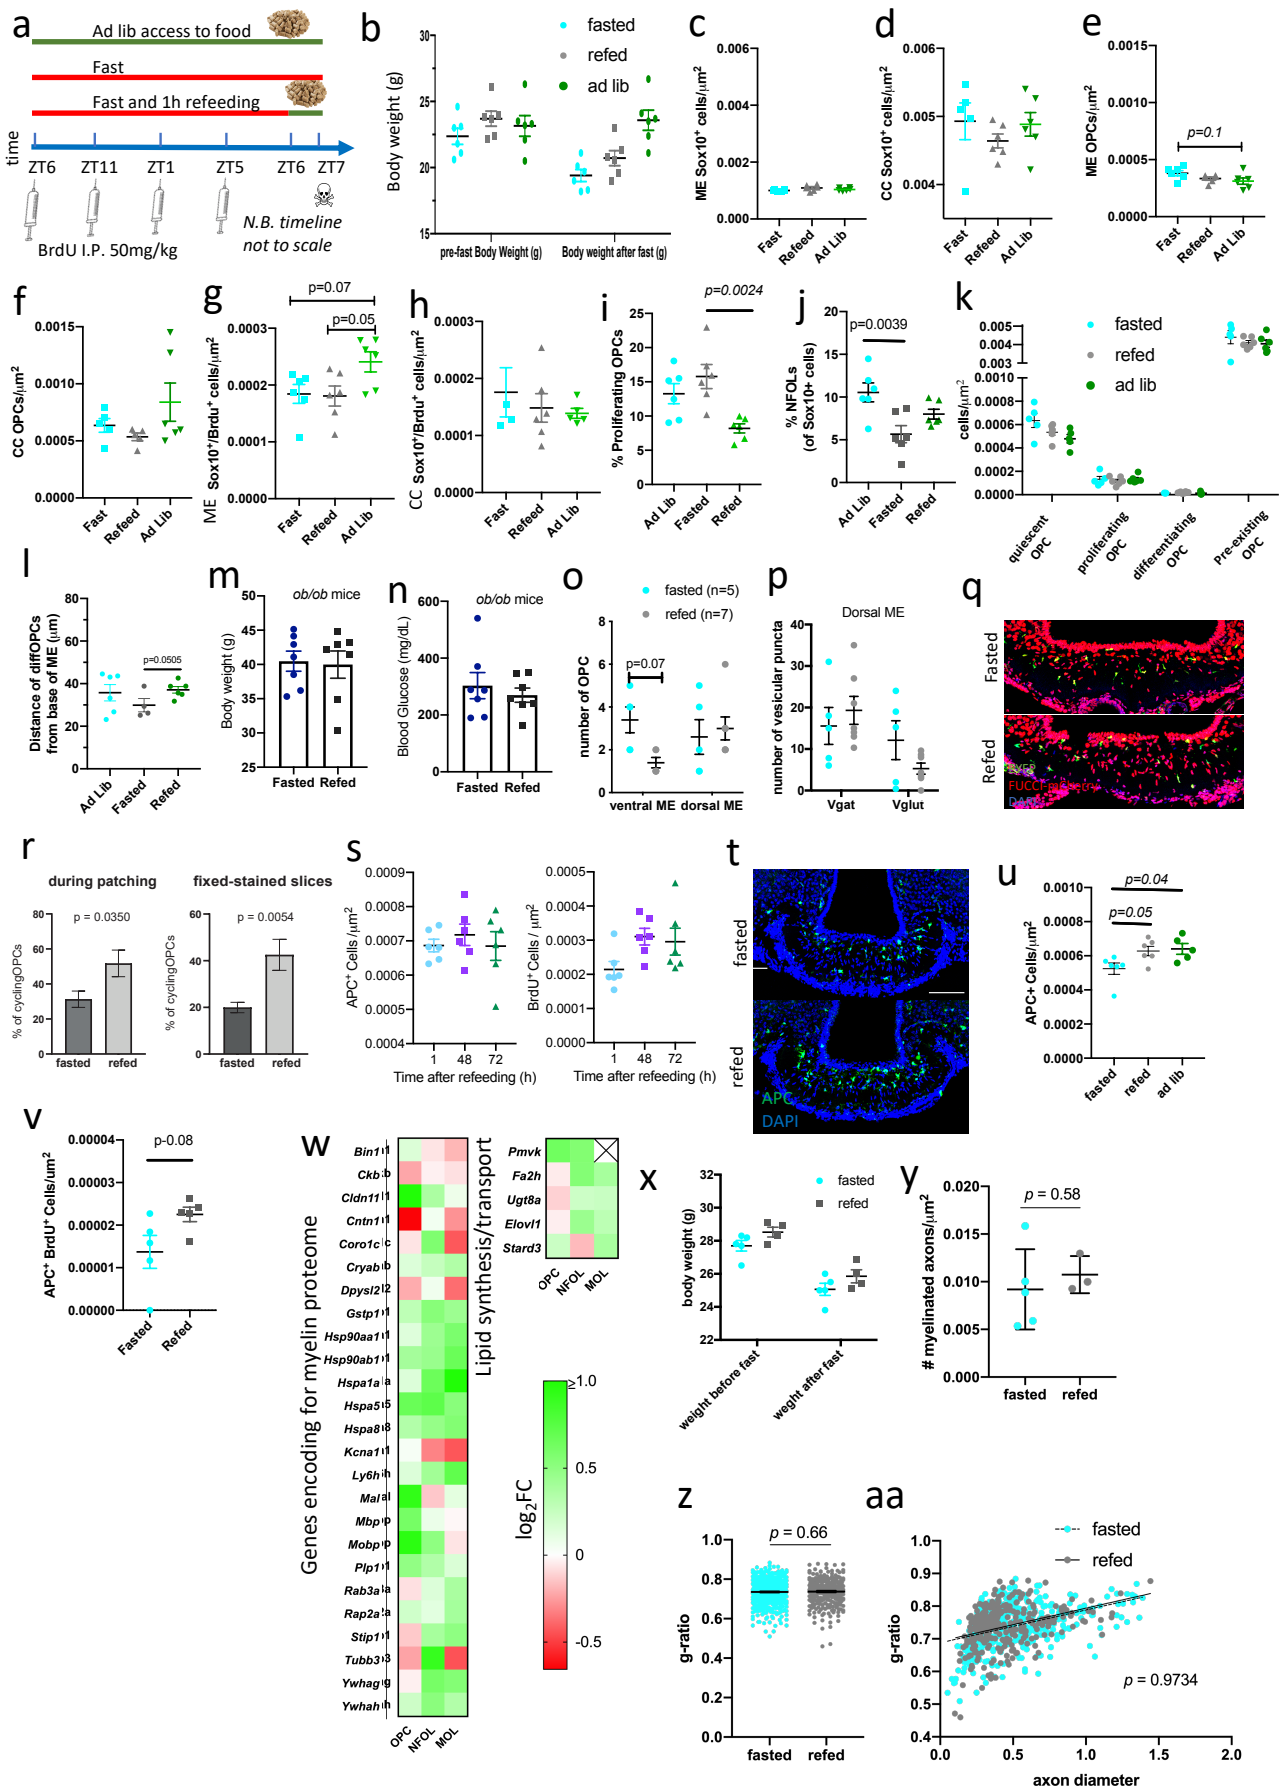

**Figure S4. Nutritional signals rapidly regulate OPC proliferation and differentiation in the ME. Related to Figure 4.**

**(a-l)** Brdu incorporation into OL lineage cells during fasting-refeeding. **(a)** Brdu administration paradigm. **(b)** Body weights before and after the 24h fast. Density of Sox10<sup>+</sup> cells **(c,d)**, OPCs **(e,f)**, Sox10<sup>+</sup>/Brdu<sup>+</sup> cells **(g,h)** in the ME **(c,e,g)** and CC **(d,f,h)**. Percentages of OPCs **(i)**, diffOPCs **(j)** in the ME. **(k)** Density of cells at different stages of the OL lineage in the CC. **(l)** Dorsoventral localization of diffOPCs (Brdu<sup>+</sup>, Sox10<sup>+</sup>, Pdgfra<sup>-</sup> cells) in the ME. **(m)** Body weight and **(n)** blood glucose of *ob/ob* mice. **(o)** Distribution of OPCs in the ventral and dorsal ME. **(p)** Quantification of GABAergic and glutamatergic vesicular puncta in the ventral ME. **(q)** YFP (green), Fucci-mcherry (red), dapi (blue) immunostaining in the ME of fasted and refeed *NG2-EYFP:Fucci2a* mice. Scale bar: 100 um **(r)** Quantification of quiescent and cycling OPCs in fasted and refeed *NG2-EYFP:Fucci2a* mice. **(s)** Density of APC<sup>+</sup> MOLs and Brdu<sup>+</sup> cells 1h, 48h and 72h after refeeding. **(t)** Immunodetection of APC in the ME of fasted and refeed mice and **(u)** quantification of APC<sup>+</sup> OLs in the ME of fed, fasted and refeed mice. Scale bar: 100 um **(v)** Density of Brdu<sup>+</sup> MOLs (APC<sup>+</sup>) in the ME of fasted and refeed Brdu treated mice. **(w)** Log<sub>2</sub>FC genes significantly changed between the fasted and refeed conditions ( $p < 0.05$  and FDR  $< 0.25$  for at least one cluster) and part of the myelin proteome or involved in lipid synthesis and transport. An 'X' indicates the gene is not expressed in one or both conditions in that OL cluster. **(x)** Body weights before and after the overnight 16h fast. **(y)** Measurements of density of myelinated axons of animals fasted (n = 5) and those fasted then refeed 2h (n = 3), **(z)** Measurements of g-ratio of myelinated axons in fasted (n = 5 mice, 481 axons) and refeed (n = 3 mice, 308 axons) conditions. **(aa)** Measurement of slopes of linear regression lines to fit g-ratio (as in f) plotted against axon diameter. Error bars indicate mean  $\pm$  SEM

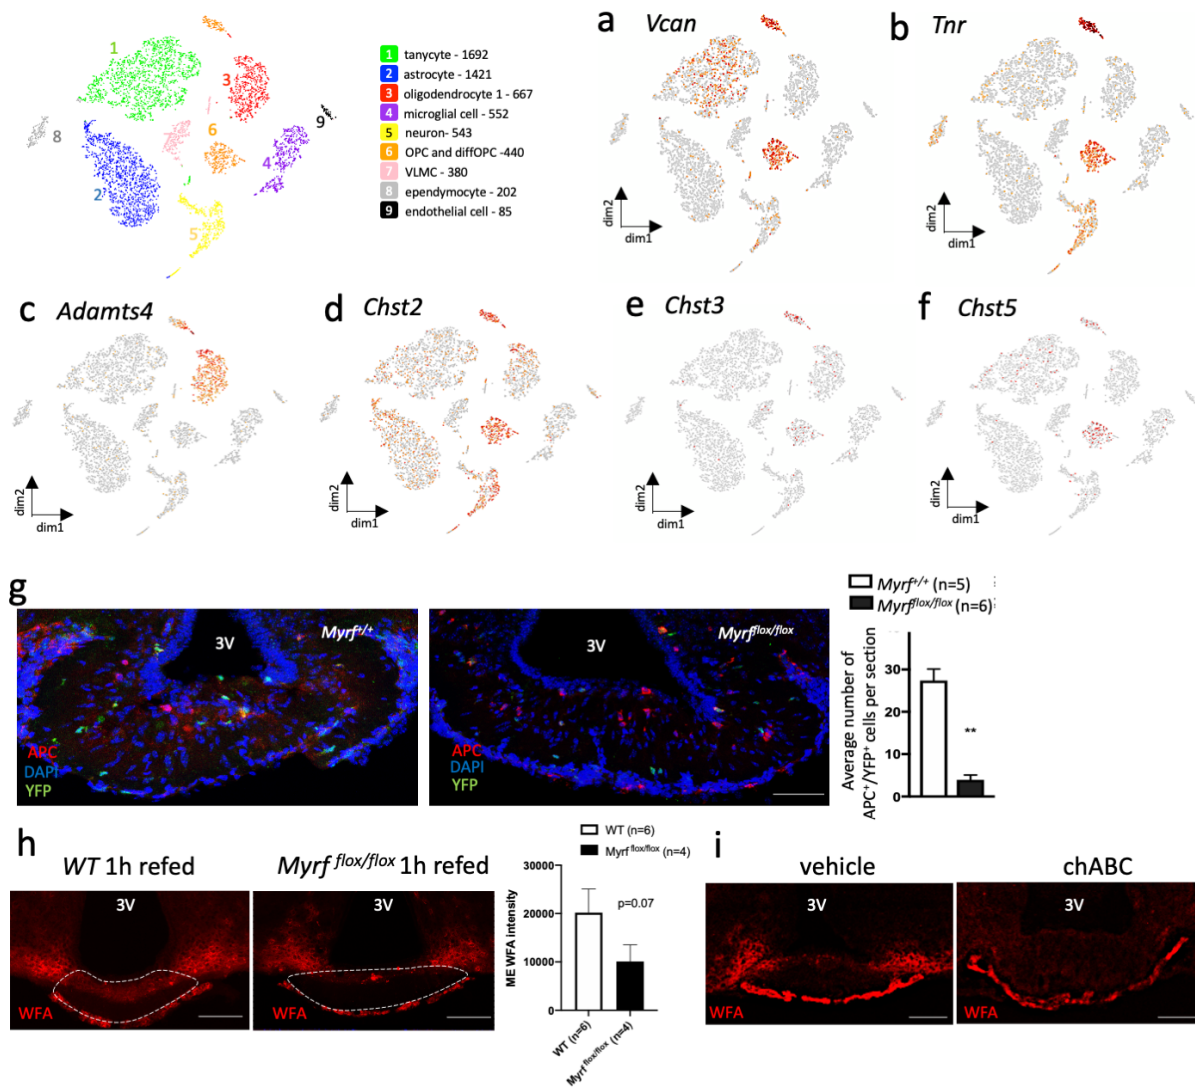

**Figure S5. Nutritional regulation of oligodendrocyte lineage progression in the ME regulates local perineuronal nets. Related to Figure 5.**

(a-f) Heatmap of genes involved in ECM assembly and remodelling and enriched in OL lineage cells. (g) Co-staining of APC (red), YFP (green) and DAPI (blue) in the ME of *Myrf*<sup>+/+</sup> and *Myrf*<sup>flx/flx</sup> mice, and quantification of the average number of APC<sup>+</sup>/YFP<sup>+</sup> cells per section (n=4). \*\*: p<0.01. scale bar : 75  $\mu$ m. (h) WFA immunolabelling in 1h refed WT or *Myrf*<sup>flx/flx</sup> mice. Circled areas depicts ME are quantified for WFA intensity. Scale bar : 100  $\mu$ m. (n=4) (i) WFA immunolabelling in the median eminence of mice treated locally with vehicle (saline) or chABC. Scale bar : 100  $\mu$ m. Data are means +sem.



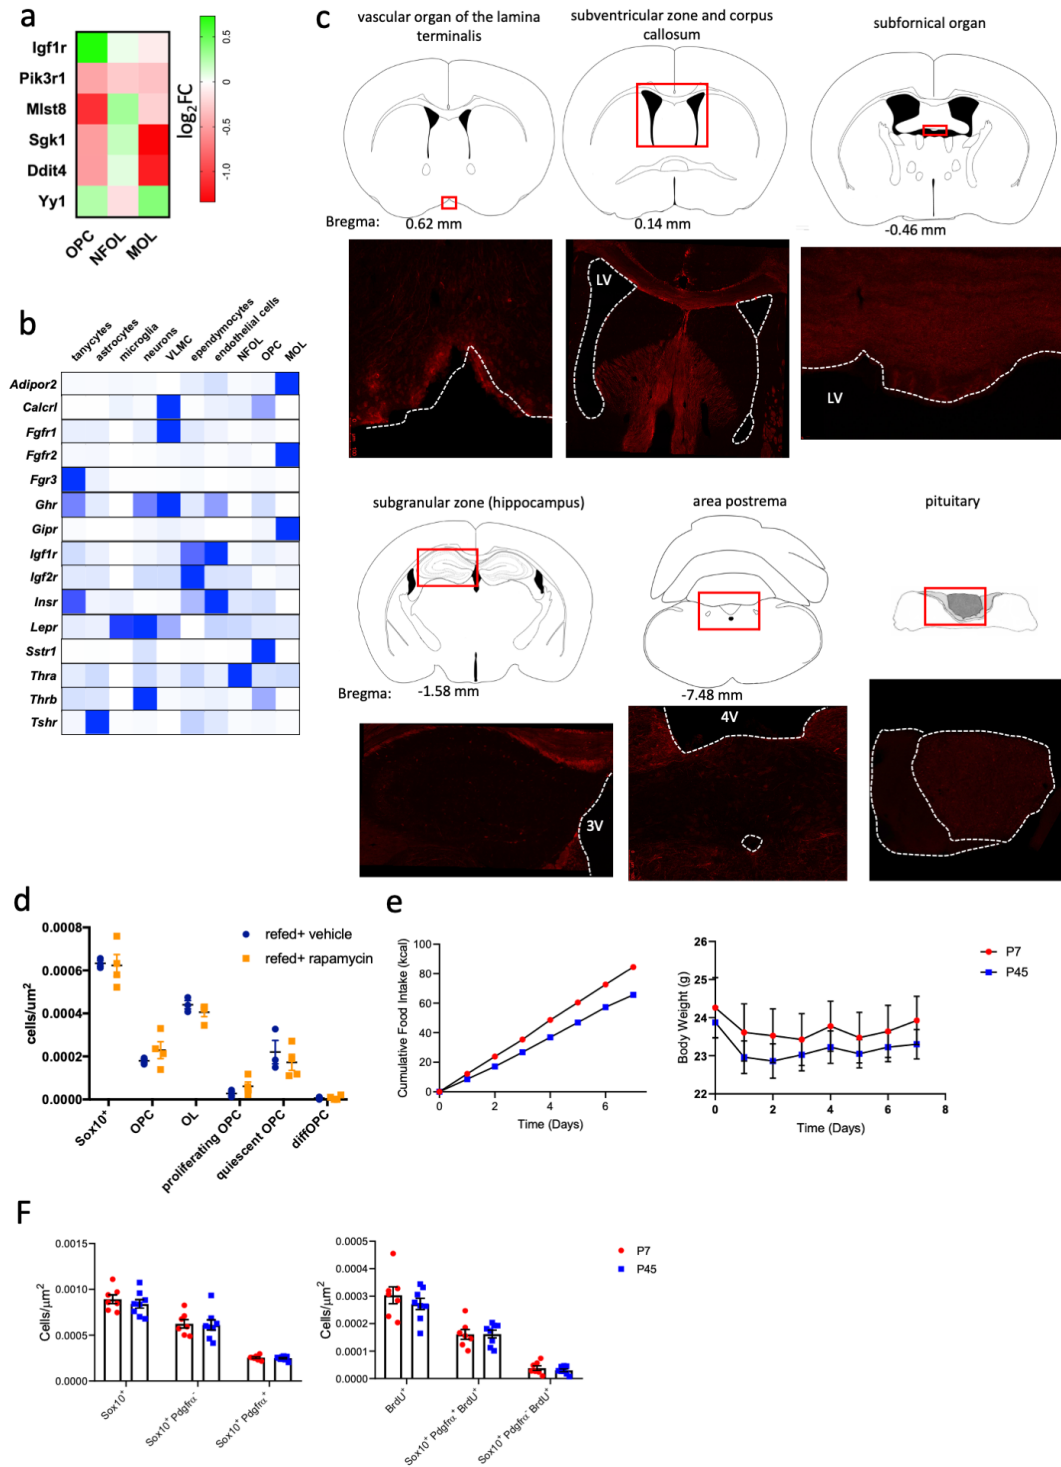

**Figure S6. mTORC1 signaling is highly active and nutritionally regulated in the ME oligodendrocytes. Related to Figure 6.**

(a) Heatmap of genes involved in mTOR signaling that are differentially expressed in scRNAseq dataset ( $p < 0.5$ , FDR  $< 0.25$ , *Pik3r* produces the p85 protein). (b) Relative expression of receptors for metabolic hormones in various cell types present in the ME. Scale is variable. (c) Labelling with the antibody to pmTOR (Ser 2448) in white matter tracts and other circumventricular organs throughout the mouse brain. (d) ME density of cells in the OL lineage in 1h refeed mice pre-treated with vehicle or rapamycin to inhibit mTORC1. (e) Cumulative food intake and body weight gain in mice fed isocaloric low-protein (P7) or high protein (P45) diets for 7 days. ( $n=8$ ) (f) ME density of cells in the OL lineage and cells that incorporated BrdU during 24h in mice fed with isocaloric low-protein (P7) or high protein (P45) diets. Data are means+sem.
